# Supplementary material
Source: PubMed Central journal article supplement (PMC1895253)

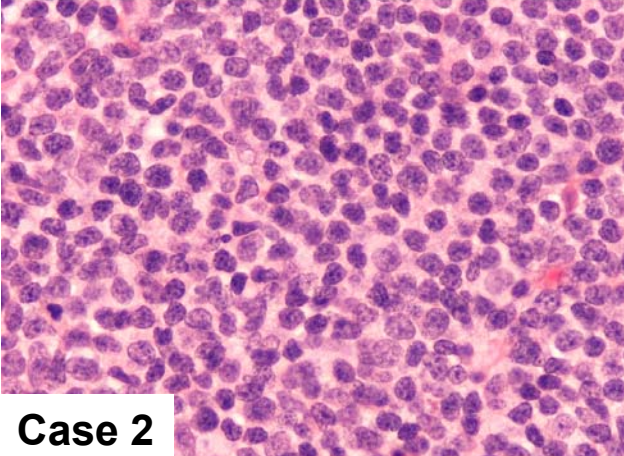

**Case 2**

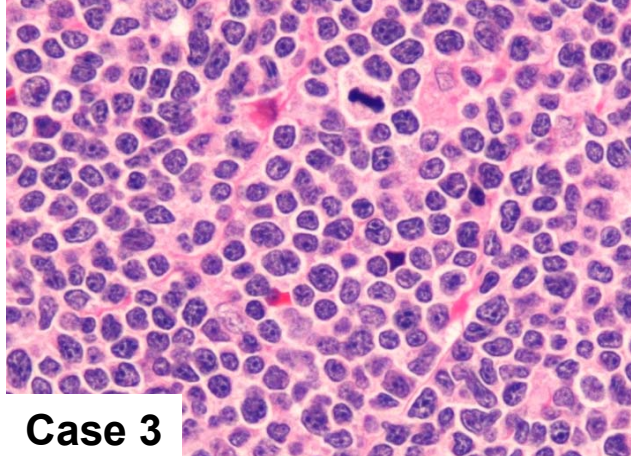

**Case 3**

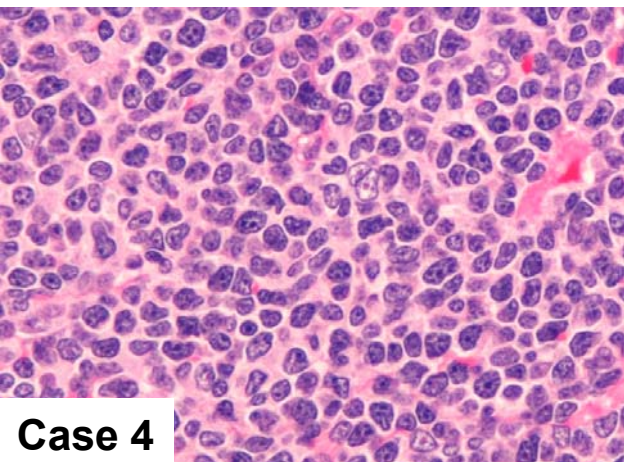

**Case 4**

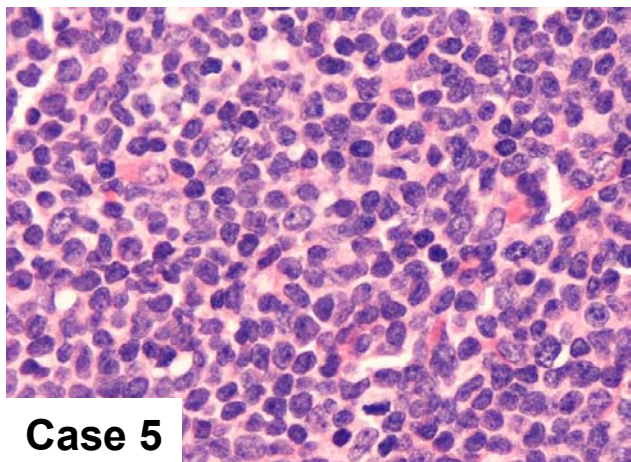

**Case 5**

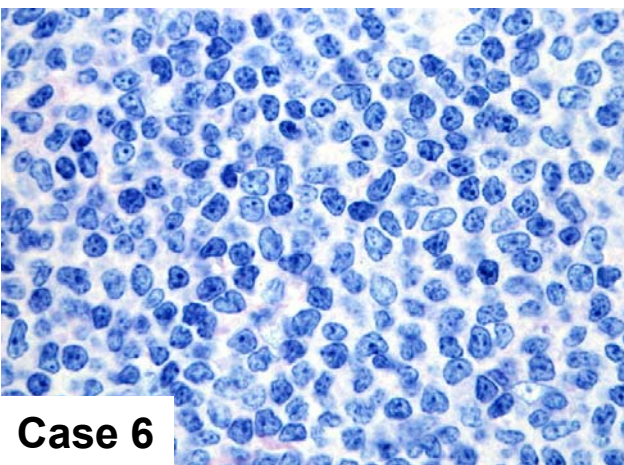

**Case 6**

Supplement: blood_2005-04-1753_1.pdf [file blood_2005-04-1753_1.pdf]
